# Supplementary material for: An AP-MS- and BioID-compatible MAC-tag enables comprehensive mapping of protein interactions and subcellular localizations
Source: PubMed Central journal article supplement (PMC5864832; doi:10.1038/s41467-018-03523-2), 2018-03-22
Supplement: 41467_2018_3523_MOESM2_ESM.pdf [file 41467_2018_3523_MOESM2_ESM.pdf]

Editorial Note: this manuscript has been previously reviewed at another journal that is not operating a transparent peer review scheme. This document only contains reviewer comments and rebuttal letters for versions considered at Nature Communications.
