# Supplementary material for: An AP-MS- and BioID-compatible MAC-tag enables comprehensive mapping of protein interactions and subcellular localizations
Source: PubMed Central journal article supplement (PMC5864832; doi:10.1038/s41467-018-03523-2), 2018-03-22
Supplement: 41467_2018_3523_MOESM3_ESM.pdf [file 41467_2018_3523_MOESM3_ESM.pdf]

## **Description of Additional Supplementary Files**

File Name: Supplementary Data 1

Description: Bait proteins information and high-confidence interactions.

File Name: Supplementary Data 2

Description: Matrix for generating heatmap.

File Name: Supplementary Data 3

Description: Application of MS-microscopy on published BioID data.
